# Supplementary material for: Efficacy and Safety of the Combination Treatment of Rituximab and Dexamethasone for Adults with Primary Immune Thrombocytopenia (ITP): A Meta-Analysis
Source: Hindawi journal article supplement (doi:10.1155/2018/1316096), 2018-12-12
Supplement: f1 [file 1316096.f1.pdf]

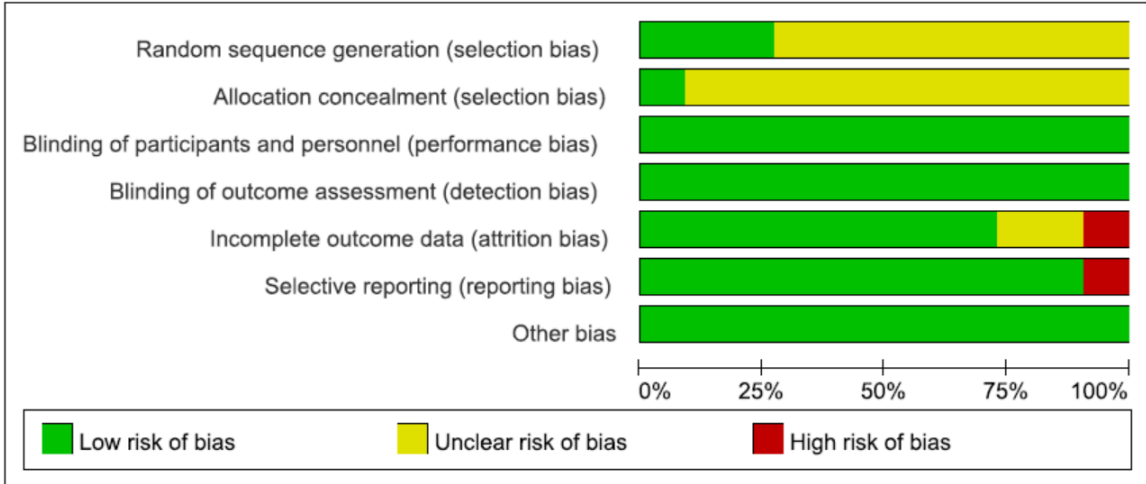

|                          | Random sequence generation (selection bias) | Allocation concealment (selection bias) | Blinding of participants and personnel (performance bias) | Blinding of outcome assessment (detection bias) | Incomplete outcome data (attrition bias) | Selective reporting (reporting bias) | Other bias |
|--------------------------|---------------------------------------------|-----------------------------------------|-----------------------------------------------------------|-------------------------------------------------|------------------------------------------|--------------------------------------|------------|
| Chen Rongban 2015        | ?                                           | ?                                       | +                                                         | +                                               | -                                        | +                                    | +          |
| Chen Shengmei 2015       | +                                           | ?                                       | +                                                         | +                                               | +                                        | +                                    | +          |
| Chen Yuji 2015           | ?                                           | ?                                       | +                                                         | +                                               | +                                        | +                                    | +          |
| Cui Yunxia 2015          | +                                           | ?                                       | +                                                         | +                                               | +                                        | +                                    | +          |
| Francesco Zaja 2010      | ?                                           | ?                                       | +                                                         | +                                               | +                                        | +                                    | +          |
| Liu Kaige 2012           | ?                                           | ?                                       | +                                                         | +                                               | +                                        | +                                    | +          |
| Meng Jingye 2017         | ?                                           | ?                                       | +                                                         | +                                               | ?                                        | -                                    | +          |
| Sif Gudbrandsdottir 2013 | +                                           | +                                       | +                                                         | +                                               | ?                                        | +                                    | +          |
| Yang Huijuan 2010        | ?                                           | ?                                       | +                                                         | +                                               | +                                        | +                                    | +          |
| Zhang Xiaojuan 2015      | ?                                           | ?                                       | +                                                         | +                                               | +                                        | +                                    | +          |
| Zhenyu Li 2011           | ?                                           | ?                                       | +                                                         | +                                               | +                                        | +                                    | +          |

S1\_Fig. Risk of bias summary and risk of bias graph according to Cochrane Risk of Bias assessment tool.
