# Supplementary material for: Efficacy and Safety of the Combination Treatment of Rituximab and Dexamethasone for Adults with Primary Immune Thrombocytopenia (ITP): A Meta-Analysis
Source: Hindawi journal article supplement (doi:10.1155/2018/1316096), 2018-12-12
Supplement: f2 [file 1316096.f2.pdf]

### OR in 28 days for primary immune thrombocytopenia

Patient or population: patients with primary immune thrombocytopenia

Settings:

Intervention: OR in 28 days

| Outcomes      | Illustrative comparative risks* (95% CI) |                                     | Relative effect (95% CI)  | No of Participants (studies) | Quality of the evidence (GRADE) | Comments |
|---------------|------------------------------------------|-------------------------------------|---------------------------|------------------------------|---------------------------------|----------|
|               | Assumed risk<br>Control                  | Corresponding risk<br>OR in 28 days |                           |                              |                                 |          |
| OR in 28 days | Study population                         |                                     | RR 1.26<br>(1.12 to 1.41) | 435<br>(6 studies)           | ⊕⊕⊕⊖<br>low <sup>1,2</sup>      |          |
|               | 647 per 1000                             | 815 per 1000<br>(725 to 912)        |                           |                              |                                 |          |
|               | Medium risk population                   |                                     |                           |                              |                                 |          |
|               | 684 per 1000                             | 862 per 1000<br>(766 to 964)        |                           |                              |                                 |          |

\*The basis for the **assumed risk** (e.g. the median control group risk across studies) is provided in footnotes. The **corresponding risk** (and its 95% confidence interval) is based on the assumed risk in the comparison group and the **relative effect** of the intervention (and its 95% CI).

CI: Confidence interval; RR: Risk ratio;

GRADE Working Group grades of evidence

**High quality:** Further research is very unlikely to change our confidence in the estimate of effect.

**Moderate quality:** Further research is likely to have an important impact on our confidence in the estimate of effect and may change the estimate.

**Low quality:** Further research is very likely to have an important impact on our confidence in the estimate of effect and is likely to change the estimate.

**Very low quality:** We are very uncertain about the estimate.

<sup>1</sup> Allocation concealment is uncertain

<sup>2</sup> Funnel plot is not symmetric.

### OR in 3 months for primary immune thrombocytopenia

Patient or population: patients with primary immune thrombocytopenia

Settings:

Intervention: OR in 3 months

| Outcomes       | Illustrative comparative risks* (95% CI) |                                      | Relative effect (95% CI)  | No of Participants (studies) | Quality of the evidence (GRADE) | Comments |
|----------------|------------------------------------------|--------------------------------------|---------------------------|------------------------------|---------------------------------|----------|
|                | Assumed risk<br>Control                  | Corresponding risk<br>OR in 3 months |                           |                              |                                 |          |
| OR in 3 months | Study population                         |                                      | RR 2.41<br>(1.82 to 3.19) | 218<br>(3 studies)           | ⊕⊕⊕⊕<br>high <sup>1</sup>       |          |
|                | 336 per 1000                             | 810 per 1000<br>(612 to 1000)        |                           |                              |                                 |          |
|                | Medium risk population                   |                                      |                           |                              |                                 |          |
|                | 360 per 1000                             | 868 per 1000<br>(655 to 1000)        |                           |                              |                                 |          |

\*The basis for the **assumed risk** (e.g. the median control group risk across studies) is provided in footnotes. The **corresponding risk** (and its 95% confidence interval) is based on the assumed risk in the comparison group and the **relative effect** of the intervention (and its 95% CI).

CI: Confidence interval; RR: Risk ratio;

GRADE Working Group grades of evidence

**High quality:** Further research is very unlikely to change our confidence in the estimate of effect.

**Moderate quality:** Further research is likely to have an important impact on our confidence in the estimate of effect and may change the estimate.

**Low quality:** Further research is very likely to have an important impact on our confidence in the estimate of effect and is likely to change the estimate.

**Very low quality:** We are very uncertain about the estimate.

<sup>1</sup> Randomized method was not mentioned.

### CR in 28 days for primary immune thrombocytopenia

Patient or population: patients with primary immune thrombocytopenia

Settings:

Intervention: CR in 28 days

| Outcomes      | Illustrative comparative risks* (95% CI) |                                     | Relative effect (95% CI)  | No of Participants (studies) | Quality of the evidence (GRADE) | Comments |
|---------------|------------------------------------------|-------------------------------------|---------------------------|------------------------------|---------------------------------|----------|
|               | Assumed risk<br>Control                  | Corresponding risk<br>CR in 28 days |                           |                              |                                 |          |
| CR in 28 days | Study population                         |                                     | RR 2.06<br>(1.63 to 2.62) | 435<br>(6 studies)           | ⊕⊕⊕⊖<br>low <sup>1,2</sup>      |          |
|               | 275 per 1000                             | 566 per 1000<br>(448 to 720)        |                           |                              |                                 |          |
|               | Medium risk population                   |                                     |                           |                              |                                 |          |
|               | 239 per 1000                             | 492 per 1000<br>(390 to 626)        |                           |                              |                                 |          |

\*The basis for the **assumed risk** (e.g. the median control group risk across studies) is provided in footnotes. The **corresponding risk** (and its 95% confidence interval) is based on the assumed risk in the comparison group and the **relative effect** of the intervention (and its 95% CI).

CI: Confidence interval; RR: Risk ratio;

GRADE Working Group grades of evidence

**High quality:** Further research is very unlikely to change our confidence in the estimate of effect.

**Moderate quality:** Further research is likely to have an important impact on our confidence in the estimate of effect and may change the estimate.

**Low quality:** Further research is very likely to have an important impact on our confidence in the estimate of effect and is likely to change the estimate.

**Very low quality:** We are very uncertain about the estimate.

<sup>1</sup> Concealment of allocation was uncertain

<sup>2</sup> There was a publication bias.

### CR in 3 months for primary immune thrombocytopenia

Patient or population: patients with primary immune thrombocytopenia

Settings:

Intervention: CR in 3 months

| Outcomes       | Illustrative comparative risks* (95% CI) |                                   | Relative effect (95% CI)  | No of Participants (studies) | Quality of the evidence (GRADE) | Comments |
|----------------|------------------------------------------|-----------------------------------|---------------------------|------------------------------|---------------------------------|----------|
|                | Assumed risk Control                     | Corresponding risk CR in 3 months |                           |                              |                                 |          |
| CR in 3 months | Study population                         |                                   | RR 5.07<br>(2.91 to 8.86) | 218<br>(3 studies)           | ⊕⊕⊕⊕<br>high                    |          |
|                | 112 per 1000                             | 568 per 1000<br>(326 to 992)      |                           |                              |                                 |          |
|                | Medium risk population                   |                                   |                           |                              |                                 |          |
|                | 100 per 1000                             | 507 per 1000<br>(291 to 886)      |                           |                              |                                 |          |

\*The basis for the **assumed risk** (e.g. the median control group risk across studies) is provided in footnotes. The **corresponding risk** (and its 95% confidence interval) is based on the assumed risk in the comparison group and the **relative effect** of the intervention (and its 95% CI).

CI: Confidence interval; RR: Risk ratio;

GRADE Working Group grades of evidence

**High quality:** Further research is very unlikely to change our confidence in the estimate of effect.

**Moderate quality:** Further research is likely to have an important impact on our confidence in the estimate of effect and may change the estimate.

**Low quality:** Further research is very likely to have an important impact on our confidence in the estimate of effect and is likely to change the estimate.

**Very low quality:** We are very uncertain about the estimate.

### PR in 28 days for primary immune thrombocytopenia

Patient or population: patients with primary immune thrombocytopenia

Settings:

Intervention: PR in 28 days

| Outcomes      | Illustrative comparative risks* (95% CI) |                                  | Relative effect (95% CI)  | No of Participants (studies) | Quality of the evidence (GRADE) | Comments |
|---------------|------------------------------------------|----------------------------------|---------------------------|------------------------------|---------------------------------|----------|
|               | Assumed risk Control                     | Corresponding risk PR in 28 days |                           |                              |                                 |          |
| PR in 28 days | Study population                         |                                  | RR 0.66<br>(0.49 to 0.88) | 435<br>(6 studies)           | ⊕⊕⊕⊖<br>moderate <sup>1</sup>   |          |
|               | 372 per 1000                             | 246 per 1000<br>(182 to 327)     |                           |                              |                                 |          |
|               | Medium risk population                   |                                  |                           |                              |                                 |          |
|               | 408 per 1000                             | 269 per 1000<br>(200 to 359)     |                           |                              |                                 |          |

\*The basis for the **assumed risk** (e.g. the median control group risk across studies) is provided in footnotes. The **corresponding risk** (and its 95% confidence interval) is based on the assumed risk in the comparison group and the **relative effect** of the intervention (and its 95% CI).

CI: Confidence interval; RR: Risk ratio;

GRADE Working Group grades of evidence

**High quality:** Further research is very unlikely to change our confidence in the estimate of effect.

**Moderate quality:** Further research is likely to have an important impact on our confidence in the estimate of effect and may change the estimate.

**Low quality:** Further research is very likely to have an important impact on our confidence in the estimate of effect and is likely to change the estimate.

**Very low quality:** We are very uncertain about the estimate.

<sup>1</sup> Concealment of allocation was uncertain.

### PR in 3 months for primary immune thrombocytopenia

Patient or population: patients with primary immune thrombocytopenia

Settings:

Intervention: PR in 3 months

| Outcomes       | Illustrative comparative risks* (95% CI) |                                   | Relative effect (95% CI)  | No of Participants (studies) | Quality of the evidence (GRADE) | Comments |
|----------------|------------------------------------------|-----------------------------------|---------------------------|------------------------------|---------------------------------|----------|
|                | Assumed risk Control                     | Corresponding risk PR in 3 months |                           |                              |                                 |          |
| PR in 3 months | Study population                         |                                   | RR 1.08<br>(0.67 to 1.74) | 218<br>(3 studies)           | ⊕⊕⊕⊕<br>high                    |          |
|                | 224 per 1000                             | 242 per 1000<br>(150 to 390)      |                           |                              |                                 |          |
|                | Medium risk population                   |                                   |                           |                              |                                 |          |
|                | 227 per 1000                             | 245 per 1000<br>(152 to 395)      |                           |                              |                                 |          |

\*The basis for the **assumed risk** (e.g. the median control group risk across studies) is provided in footnotes. The **corresponding risk** (and its 95% confidence interval) is based on the assumed risk in the comparison group and the **relative effect** of the intervention (and its 95% CI).

CI: Confidence interval; RR: Risk ratio;

GRADE Working Group grades of evidence

**High quality:** Further research is very unlikely to change our confidence in the estimate of effect.

**Moderate quality:** Further research is likely to have an important impact on our confidence in the estimate of effect and may change the estimate.

**Low quality:** Further research is very likely to have an important impact on our confidence in the estimate of effect and is likely to change the estimate.

**Very low quality:** We are very uncertain about the estimate.

### SR in 6 months for primary immune thrombocytopenia

**Patient or population:** patients with primary immune thrombocytopenia

**Settings:**

**Intervention:** SR in 6 months

| Outcomes       | Illustrative comparative risks* (95% CI) |                                   | Relative effect (95% CI)  | No of Participants (studies) | Quality of the evidence (GRADE) | Comments |
|----------------|------------------------------------------|-----------------------------------|---------------------------|------------------------------|---------------------------------|----------|
|                | Assumed risk Control                     | Corresponding risk SR in 6 months |                           |                              |                                 |          |
| SR in 6 months | Study population                         |                                   | RR 1.73<br>(1.36 to 2.19) | 296<br>(3 studies)           | ⊕⊕⊕⊖<br>moderate <sup>1</sup>   |          |
|                | 370 per 1000                             | 640 per 1000<br>(503 to 810)      |                           |                              |                                 |          |
|                | Medium risk population                   |                                   |                           |                              |                                 |          |
|                | 366 per 1000                             | 633 per 1000<br>(498 to 802)      |                           |                              |                                 |          |

\*The basis for the **assumed risk** (e.g. the median control group risk across studies) is provided in footnotes. The **corresponding risk** (and its 95% confidence interval) is based on the assumed risk in the comparison group and the **relative effect** of the intervention (and its 95% CI).

CI: Confidence interval; RR: Risk ratio;

GRADE Working Group grades of evidence

**High quality:** Further research is very unlikely to change our confidence in the estimate of effect.

**Moderate quality:** Further research is likely to have an important impact on our confidence in the estimate of effect and may change the estimate.

**Low quality:** Further research is very likely to have an important impact on our confidence in the estimate of effect and is likely to change the estimate.

**Very low quality:** We are very uncertain about the estimate.

<sup>1</sup> concealment of allocation

### SR in 12 months for primary immune thrombocytopenia

**Patient or population:** patients with primary immune thrombocytopenia

**Settings:**

**Intervention:** SR in 12 months

| Outcomes        | Illustrative comparative risks* (95% CI) |                                    | Relative effect (95% CI) | No of Participants (studies) | Quality of the evidence (GRADE) | Comments |
|-----------------|------------------------------------------|------------------------------------|--------------------------|------------------------------|---------------------------------|----------|
|                 | Assumed risk Control                     | Corresponding risk SR in 12 months |                          |                              |                                 |          |
| SR in 12 months | Study population                         |                                    | RR 2.19<br>(1.6 to 3.02) | 274<br>(3 studies)           | ⊕⊕⊕⊖<br>moderate <sup>1</sup>   |          |
|                 | 262 per 1000                             | 574 per 1000<br>(419 to 791)       |                          |                              |                                 |          |
|                 | Medium risk population                   |                                    |                          |                              |                                 |          |
|                 | 222 per 1000                             | 486 per 1000<br>(355 to 670)       |                          |                              |                                 |          |

\*The basis for the **assumed risk** (e.g. the median control group risk across studies) is provided in footnotes. The **corresponding risk** (and its 95% confidence interval) is based on the assumed risk in the comparison group and the **relative effect** of the intervention (and its 95% CI).

CI: Confidence interval; RR: Risk ratio;

GRADE Working Group grades of evidence

**High quality:** Further research is very unlikely to change our confidence in the estimate of effect.

**Moderate quality:** Further research is likely to have an important impact on our confidence in the estimate of effect and may change the estimate.

**Low quality:** Further research is very likely to have an important impact on our confidence in the estimate of effect and is likely to change the estimate.

**Very low quality:** We are very uncertain about the estimate.

<sup>1</sup> concealment of allocation

### Relapse for primary immune thrombocytopenia

**Patient or population:** patients with primary immune thrombocytopenia

**Settings:**

**Intervention:** Relapse

| Outcomes | Illustrative comparative risks* (95% CI) |                              | Relative effect (95% CI) | No of Participants (studies) | Quality of the evidence (GRADE) | Comments |
|----------|------------------------------------------|------------------------------|--------------------------|------------------------------|---------------------------------|----------|
|          | Assumed risk Control                     | Corresponding risk Relapse   |                          |                              |                                 |          |
| Relapse  | Study population                         |                              | RR 0.63<br>(0.4 to 1.02) | 437<br>(5 studies)           | ⊕⊕⊕⊕<br>high                    |          |
|          | 269 per 1000                             | 169 per 1000<br>(108 to 274) |                          |                              |                                 |          |
|          | Medium risk population                   |                              |                          |                              |                                 |          |
|          | 254 per 1000                             | 160 per 1000<br>(102 to 259) |                          |                              |                                 |          |

\*The basis for the **assumed risk** (e.g. the median control group risk across studies) is provided in footnotes. The **corresponding risk** (and its 95% confidence interval) is based on the assumed risk in the comparison group and the **relative effect** of the intervention (and its 95% CI).

CI: Confidence interval; RR: Risk ratio;

GRADE Working Group grades of evidence

**High quality:** Further research is very unlikely to change our confidence in the estimate of effect.

**Moderate quality:** Further research is likely to have an important impact on our confidence in the estimate of effect and may change the estimate.

**Low quality:** Further research is very likely to have an important impact on our confidence in the estimate of effect and is likely to change the estimate.

**Very low quality:** We are very uncertain about the estimate.

### Treg on baseline for primary immune thrombocytopenia

Patient or population: patients with primary immune thrombocytopenia

Settings:

Intervention: Treg on baseline

| Outcomes         | Illustrative comparative risks* (95% CI) |                                                                                                     | Relative effect (95% CI) | No of Participants (studies) | Quality of the evidence (GRADE)            | Comments |
|------------------|------------------------------------------|-----------------------------------------------------------------------------------------------------|--------------------------|------------------------------|--------------------------------------------|----------|
|                  | Assumed risk<br>Control                  | Corresponding risk<br>Treg on baseline                                                              |                          |                              |                                            |          |
| Treg on baseline |                                          | The mean Treg on baseline in the intervention groups was <b>0 higher</b> (0.2 lower to 0.19 higher) |                          | 246 (3 studies)              | ⊕⊕⊕⊖ <sup>1</sup><br>moderate <sup>1</sup> |          |

\*The basis for the **assumed risk** (e.g. the median control group risk across studies) is provided in footnotes. The **corresponding risk** (and its 95% confidence interval) is based on the assumed risk in the comparison group and the **relative effect** of the intervention (and its 95% CI).

CI: Confidence interval;

GRADE Working Group grades of evidence

**High quality:** Further research is very unlikely to change our confidence in the estimate of effect.

**Moderate quality:** Further research is likely to have an important impact on our confidence in the estimate of effect and may change the estimate.

**Low quality:** Further research is very likely to have an important impact on our confidence in the estimate of effect and is likely to change the estimate.

**Very low quality:** We are very uncertain about the estimate.

<sup>1</sup> risk of bias

### Treg day14 for primary immune thrombocytopenia

Patient or population: patients with primary immune thrombocytopenia

Settings:

Intervention: Treg day14

| Outcomes   | Illustrative comparative risks* (95% CI) |                                                                                             | Relative effect (95% CI) | No of Participants (studies) | Quality of the evidence (GRADE)            | Comments |
|------------|------------------------------------------|---------------------------------------------------------------------------------------------|--------------------------|------------------------------|--------------------------------------------|----------|
|            | Assumed risk<br>Control                  | Corresponding risk<br>Treg day14                                                            |                          |                              |                                            |          |
| Treg day14 |                                          | The mean Treg day14 in the intervention groups was <b>1.02 higher</b> (0.76 to 1.28 higher) |                          | 246 (3 studies)              | ⊕⊕⊕⊖ <sup>1</sup><br>moderate <sup>1</sup> |          |

\*The basis for the **assumed risk** (e.g. the median control group risk across studies) is provided in footnotes. The **corresponding risk** (and its 95% confidence interval) is based on the assumed risk in the comparison group and the **relative effect** of the intervention (and its 95% CI).

CI: Confidence interval;

GRADE Working Group grades of evidence

**High quality:** Further research is very unlikely to change our confidence in the estimate of effect.

**Moderate quality:** Further research is likely to have an important impact on our confidence in the estimate of effect and may change the estimate.

**Low quality:** Further research is very likely to have an important impact on our confidence in the estimate of effect and is likely to change the estimate.

**Very low quality:** We are very uncertain about the estimate.

<sup>1</sup> risk of bias

### Treg on day 28 for primary immune thrombocytopenia

Patient or population: patients with primary immune thrombocytopenia

Settings:

Intervention: Treg on day 28

| Outcomes       | Illustrative comparative risks* (95% CI) |                                                                                                | Relative effect (95% CI) | No of Participants (studies) | Quality of the evidence (GRADE)            | Comments |
|----------------|------------------------------------------|------------------------------------------------------------------------------------------------|--------------------------|------------------------------|--------------------------------------------|----------|
|                | Assumed risk<br>Control                  | Corresponding risk<br>Treg on day 28                                                           |                          |                              |                                            |          |
| Treg on day 28 |                                          | The mean Treg on day 28 in the intervention groups was <b>2.19 higher</b> (1.6 to 2.77 higher) |                          | 246 (3 studies)              | ⊕⊕⊕⊖ <sup>1</sup><br>moderate <sup>1</sup> |          |

\*The basis for the **assumed risk** (e.g. the median control group risk across studies) is provided in footnotes. The **corresponding risk** (and its 95% confidence interval) is based on the assumed risk in the comparison group and the **relative effect** of the intervention (and its 95% CI).

CI: Confidence interval;

GRADE Working Group grades of evidence

**High quality:** Further research is very unlikely to change our confidence in the estimate of effect.

**Moderate quality:** Further research is likely to have an important impact on our confidence in the estimate of effect and may change the estimate.

**Low quality:** Further research is very likely to have an important impact on our confidence in the estimate of effect and is likely to change the estimate.

**Very low quality:** We are very uncertain about the estimate.

<sup>1</sup> risk of bias

### serious AE for primary immune thrombocytopenia

Patient or population: patients with primary immune thrombocytopenia

Settings:

Intervention: serious AE

| Outcomes   | Illustrative comparative risks* (95% CI) |                               | Relative effect (95% CI) | No of Participants (studies) | Quality of the evidence (GRADE) | Comments |
|------------|------------------------------------------|-------------------------------|--------------------------|------------------------------|---------------------------------|----------|
|            | Assumed risk Control                     | Corresponding risk Serious AE |                          |                              |                                 |          |
| serious AE | Study population                         |                               | RR 1.93<br>(1 to 3.71)   | 286<br>(3 studies)           | ⊕⊕⊕⊕<br>high                    |          |
|            | 81 per 1000                              | 156 per 1000<br>(81 to 301)   |                          |                              |                                 |          |
|            | Medium risk population                   |                               |                          |                              |                                 |          |
|            | 80 per 1000                              | 154 per 1000<br>(80 to 297)   |                          |                              |                                 |          |

\*The basis for the **assumed risk** (e.g. the median control group risk across studies) is provided in footnotes. The **corresponding risk** (and its 95% confidence interval) is based on the assumed risk in the comparison group and the **relative effect** of the intervention (and its 95% CI).

CI: Confidence interval; RR: Risk ratio;

GRADE Working Group grades of evidence

**High quality:** Further research is very unlikely to change our confidence in the estimate of effect.

**Moderate quality:** Further research is likely to have an important impact on our confidence in the estimate of effect and may change the estimate.

**Low quality:** Further research is very likely to have an important impact on our confidence in the estimate of effect and is likely to change the estimate.

**Very low quality:** We are very uncertain about the estimate.

### infection for primary immune thrombocytopenia

Patient or population: patients with primary immune thrombocytopenia

Settings:

Intervention: infection

| Outcomes  | Illustrative comparative risks* (95% CI) |                              | Relative effect (95% CI)  | No of Participants (studies) | Quality of the evidence (GRADE) | Comments |
|-----------|------------------------------------------|------------------------------|---------------------------|------------------------------|---------------------------------|----------|
|           | Assumed risk Control                     | Corresponding risk Infection |                           |                              |                                 |          |
| infection | Study population                         |                              | RR 1.19<br>(0.86 to 1.65) | 684<br>(8 studies)           | ⊕⊕⊖⊖<br>low <sup>1,2</sup>      |          |
|           | 135 per 1000                             | 161 per 1000<br>(116 to 223) |                           |                              |                                 |          |
|           | Medium risk population                   |                              |                           |                              |                                 |          |
|           | 44 per 1000                              | 52 per 1000<br>(38 to 73)    |                           |                              |                                 |          |

\*The basis for the **assumed risk** (e.g. the median control group risk across studies) is provided in footnotes. The **corresponding risk** (and its 95% confidence interval) is based on the assumed risk in the comparison group and the **relative effect** of the intervention (and its 95% CI).

CI: Confidence interval; RR: Risk ratio;

GRADE Working Group grades of evidence

**High quality:** Further research is very unlikely to change our confidence in the estimate of effect.

**Moderate quality:** Further research is likely to have an important impact on our confidence in the estimate of effect and may change the estimate.

**Low quality:** Further research is very likely to have an important impact on our confidence in the estimate of effect and is likely to change the estimate.

**Very low quality:** We are very uncertain about the estimate.

<sup>1</sup> risk of bias

<sup>2</sup> publication bias existed

### hyperglycemia for primary immune thrombocytopenia

Patient or population: patients with primary immune thrombocytopenia

Settings:

Intervention: hyperglycemia

| Outcomes      | Illustrative comparative risks* (95% CI) |                                  | Relative effect (95% CI) | No of Participants (studies) | Quality of the evidence (GRADE) | Comments |
|---------------|------------------------------------------|----------------------------------|--------------------------|------------------------------|---------------------------------|----------|
|               | Assumed risk Control                     | Corresponding risk Hyperglycemia |                          |                              |                                 |          |
| hyperglycemia | Study population                         |                                  | RR 0.9<br>(0.58 to 1.38) | 546<br>(7 studies)           | ⊕⊕⊕⊖<br>moderate <sup>1</sup>   |          |
|               | 120 per 1000                             | 108 per 1000<br>(70 to 166)      |                          |                              |                                 |          |
|               | Medium risk population                   |                                  |                          |                              |                                 |          |
|               | 86 per 1000                              | 77 per 1000<br>(50 to 119)       |                          |                              |                                 |          |

\*The basis for the **assumed risk** (e.g. the median control group risk across studies) is provided in footnotes. The **corresponding risk** (and its 95% confidence interval) is based on the assumed risk in the comparison group and the **relative effect** of the intervention (and its 95% CI).

CI: Confidence interval; RR: Risk ratio;

GRADE Working Group grades of evidence

**High quality:** Further research is very unlikely to change our confidence in the estimate of effect.

**Moderate quality:** Further research is likely to have an important impact on our confidence in the estimate of effect and may change the estimate.

**Low quality:** Further research is very likely to have an important impact on our confidence in the estimate of effect and is likely to change the estimate.

**Very low quality:** We are very uncertain about the estimate.

<sup>1</sup> risk of bias

### hypertension for primary immune thrombocytopenia

Patient or population: patients with primary immune thrombocytopenia

Settings:

Intervention: hypertension

| Outcomes     | Illustrative comparative risks* (95% CI) |                                    | Relative effect (95% CI)  | No of Participants (studies) | Quality of the evidence (GRADE) | Comments |
|--------------|------------------------------------------|------------------------------------|---------------------------|------------------------------|---------------------------------|----------|
|              | Assumed risk<br>Control                  | Corresponding risk<br>Hypertension |                           |                              |                                 |          |
| hypertension | Study population                         |                                    | RR 1.19<br>(0.75 to 1.89) | 367<br>(5 studies)           | ⊕⊕⊕⊖<br>moderate <sup>1</sup>   |          |
|              | 137 per 1000                             | 163 per 1000<br>(103 to 259)       |                           |                              |                                 |          |
|              | Medium risk population                   |                                    |                           |                              |                                 |          |
|              | 57 per 1000                              | 68 per 1000<br>(43 to 108)         |                           |                              |                                 |          |

\*The basis for the **assumed risk** (e.g. the median control group risk across studies) is provided in footnotes. The **corresponding risk** (and its 95% confidence interval) is based on the assumed risk in the comparison group and the **relative effect** of the intervention (and its 95% CI).

CI: Confidence interval; RR: Risk ratio;

GRADE Working Group grades of evidence

**High quality:** Further research is very unlikely to change our confidence in the estimate of effect.

**Moderate quality:** Further research is likely to have an important impact on our confidence in the estimate of effect and may change the estimate.

**Low quality:** Further research is very likely to have an important impact on our confidence in the estimate of effect and is likely to change the estimate.

**Very low quality:** We are very uncertain about the estimate.

<sup>1</sup> risk of bias

### electrolyte disorder for primary immune thrombocytopenia

Patient or population: patients with primary immune thrombocytopenia

Settings:

Intervention: electrolyte disorder

| Outcomes             | Illustrative comparative risks* (95% CI) |                                            | Relative effect (95% CI)  | No of Participants (studies) | Quality of the evidence (GRADE) | Comments |
|----------------------|------------------------------------------|--------------------------------------------|---------------------------|------------------------------|---------------------------------|----------|
|                      | Assumed risk<br>Control                  | Corresponding risk<br>Electrolyte disorder |                           |                              |                                 |          |
| electrolyte disorder | Study population                         |                                            | RR 1.13<br>(0.83 to 1.54) | 394<br>(5 studies)           | ⊕⊕⊕⊖<br>moderate                |          |
|                      | 244 per 1000                             | 276 per 1000<br>(203 to 376)               |                           |                              |                                 |          |
|                      | Medium risk population                   |                                            |                           |                              |                                 |          |
|                      | 80 per 1000                              | 90 per 1000<br>(66 to 123)                 |                           |                              |                                 |          |

\*The basis for the **assumed risk** (e.g. the median control group risk across studies) is provided in footnotes. The **corresponding risk** (and its 95% confidence interval) is based on the assumed risk in the comparison group and the **relative effect** of the intervention (and its 95% CI).

CI: Confidence interval; RR: Risk ratio;

GRADE Working Group grades of evidence

**High quality:** Further research is very unlikely to change our confidence in the estimate of effect.

**Moderate quality:** Further research is likely to have an important impact on our confidence in the estimate of effect and may change the estimate.

**Low quality:** Further research is very likely to have an important impact on our confidence in the estimate of effect and is likely to change the estimate.

**Very low quality:** We are very uncertain about the estimate.

### fever for primary immune thrombocytopenia

Patient or population: patients with primary immune thrombocytopenia

Settings:

Intervention: fever

| Outcomes | Illustrative comparative risks* (95% CI) |                             | Relative effect (95% CI)  | No of Participants (studies) | Quality of the evidence (GRADE) | Comments |
|----------|------------------------------------------|-----------------------------|---------------------------|------------------------------|---------------------------------|----------|
|          | Assumed risk<br>Control                  | Corresponding risk<br>Fever |                           |                              |                                 |          |
| fever    | Study population                         |                             | RR 4.3<br>(0.92 to 20.06) | 290<br>(3 studies)           | ⊕⊕⊕⊕<br>high <sup>1</sup>       |          |
|          | 7 per 1000                               | 30 per 1000<br>(6 to 140)   |                           |                              |                                 |          |
|          | Medium risk population                   |                             |                           |                              |                                 |          |
|          | 0 per 1000                               | 0 per 1000<br>(0 to 0)      |                           |                              |                                 |          |

\*The basis for the **assumed risk** (e.g. the median control group risk across studies) is provided in footnotes. The **corresponding risk** (and its 95% confidence interval) is based on the assumed risk in the comparison group and the **relative effect** of the intervention (and its 95% CI).

CI: Confidence interval; RR: Risk ratio;

GRADE Working Group grades of evidence

**High quality:** Further research is very unlikely to change our confidence in the estimate of effect.

**Moderate quality:** Further research is likely to have an important impact on our confidence in the estimate of effect and may change the estimate.

**Low quality:** Further research is very likely to have an important impact on our confidence in the estimate of effect and is likely to change the estimate.

**Very low quality:** We are very uncertain about the estimate.

<sup>1</sup> risk of bias

**erythra for primary immune thrombocytopenia**

**Patient or population:** patients with primary immune thrombocytopenia

**Settings:**

**Intervention:** erythra

| Outcomes | Illustrative comparative risks* (95% CI) |                            | Relative effect (95% CI)  | No of Participants (studies) | Quality of the evidence (GRADE) | Comments |
|----------|------------------------------------------|----------------------------|---------------------------|------------------------------|---------------------------------|----------|
|          | Assumed risk Control                     | Corresponding risk Erythra |                           |                              |                                 |          |
| erythra  | Study population                         |                            | RR 2.05<br>(0.53 to 7.98) | 246<br>(3 studies)           | ⊕⊕⊖⊖<br>low <sup>1,2</sup>      |          |
|          | 16 per 1000                              | 33 per 1000<br>(8 to 128)  |                           |                              |                                 |          |
|          | Medium risk population                   |                            |                           |                              |                                 |          |
|          | 0 per 1000                               | 0 per 1000<br>(0 to 0)     |                           |                              |                                 |          |

\*The basis for the **assumed risk** (e.g. the median control group risk across studies) is provided in footnotes. The **corresponding risk** (and its 95% confidence interval) is based on the assumed risk in the comparison group and the **relative effect** of the intervention (and its 95% CI).

CI: Confidence interval; RR: Risk ratio;

GRADE Working Group grades of evidence

**High quality:** Further research is very unlikely to change our confidence in the estimate of effect.

**Moderate quality:** Further research is likely to have an important impact on our confidence in the estimate of effect and may change the estimate.

**Low quality:** Further research is very likely to have an important impact on our confidence in the estimate of effect and is likely to change the estimate.

**Very low quality:** We are very uncertain about the estimate.

<sup>1</sup> risk of bias

<sup>2</sup> publication bias existed

S2 Fig. Assessment of evidences by GRADE pro software.
