# Supplementary material for: Efficacy and Safety of the Combination Treatment of Rituximab and Dexamethasone for Adults with Primary Immune Thrombocytopenia (ITP): A Meta-Analysis
Source: Hindawi journal article supplement (doi:10.1155/2018/1316096), 2018-12-12

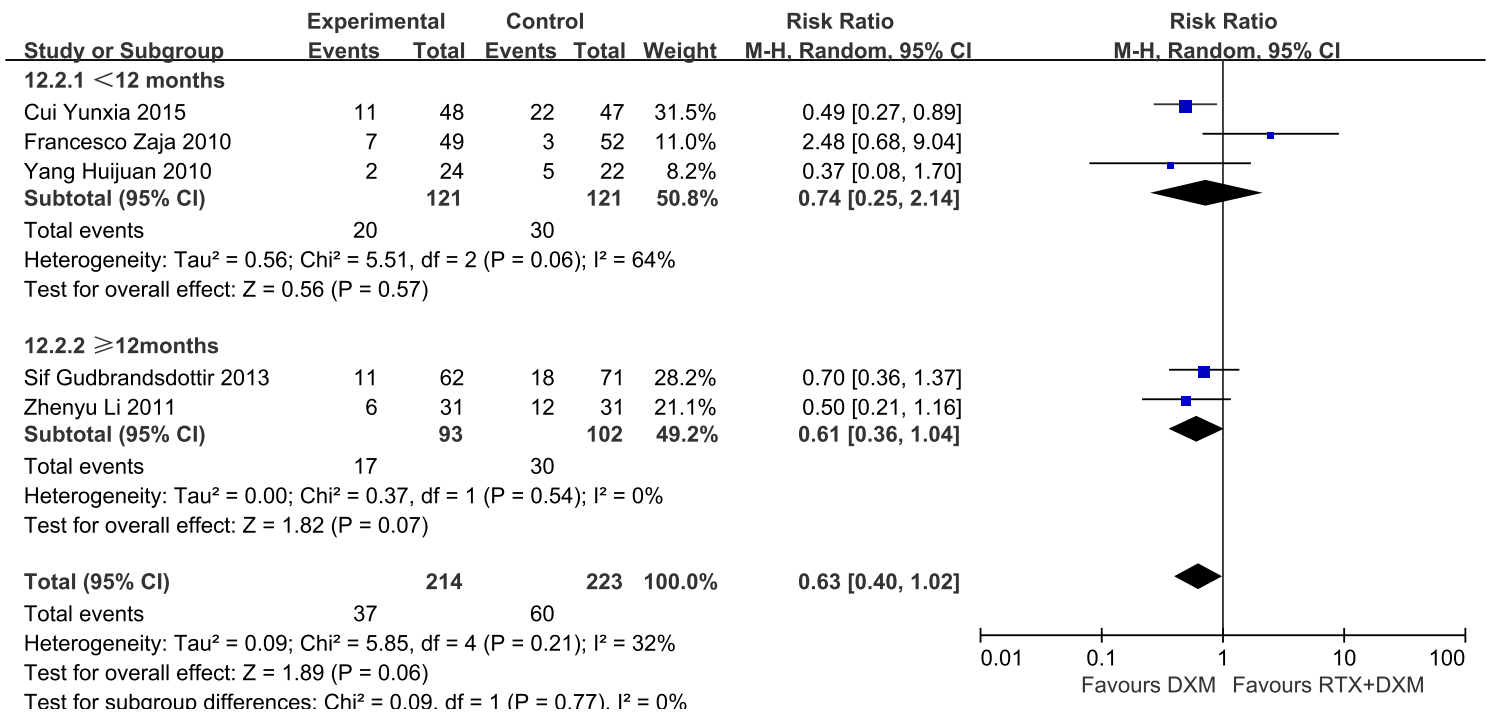

Supplement: f3 [file 1316096.f3.pdf]
